# Supplementary material for: Wearable Sensor System to Monitor Physical Activity and the Physiological Effects of Heat Exposure
Source: PubMed Central journal article supplement (PMC7039288; doi:10.3390/s20030855), 2020-02-06
Supplement: sensors-20-00855-s001.pdf [file sensors-20-00855-s001.pdf]

Supplementary

# Wearable sensor system to monitor physical activity and the physiological effects of heat exposure

Sean Pham <sup>1</sup>, Danny Yeap <sup>1</sup>, Gisela Escalera <sup>2</sup>, Rupa Basu <sup>3</sup>, Xiangmei Wu <sup>3</sup>, Nicholas J. Kenyon <sup>4,5,6</sup>, Irva Hertz-Picciotto <sup>7</sup>, Michelle J. Ko <sup>8</sup> and Cristina E. Davis <sup>1,\*</sup>

- <sup>1</sup> Department of Mechanical and Aerospace Engineering, University of California, Davis, CA 95616, USA.; [sapham@ucdavis.edu](mailto:sapham@ucdavis.edu) (S.P.); [dyeap@ucdavis.edu](mailto:dyeap@ucdavis.edu) (D.Y.)
  - <sup>2</sup> Center for Healthcare Policy and Research, University of California, Davis, CA 95616, USA.; [gescalera@ucdavis.edu](mailto:gescalera@ucdavis.edu) (G.E.)
  - <sup>3</sup> California Environmental Protection Agency, California Office of Environmental Health Hazard Assessment, 1515 Clay Street, Oakland, CA 94612, USA.; [Rupa.Basu@oehha.ca.gov](mailto:Rupa.Basu@oehha.ca.gov) (R.B.); [Xiangmei.Wu@oehha.ca.gov](mailto:Xiangmei.Wu@oehha.ca.gov) (X.W.)
  - <sup>4</sup> Department of Internal Medicine, 4150 V Street, Suite 3400, University of California, Davis, Sacramento, CA 95817, USA.; [njkenyon@ucdavis.edu](mailto:njkenyon@ucdavis.edu)
  - <sup>5</sup> Center for Comparative Respiratory Biology and Medicine, University of California, Davis, CA 95616, USA.
  - <sup>6</sup> VA Northern California Health Care System, 10535 Hospital Way, Mather, CA 95655, USA.
  - <sup>7</sup> Division of Environmental and Occupational Health, Department of Public Health, University of California, Davis, CA 95616, USA.; [iher@ucdavis.edu](mailto:iher@ucdavis.edu)
  - <sup>8</sup> Center for Regional Change, Department of Public Health, University of California, Davis, CA 95616, USA.; [mijko@ucdavis.edu](mailto:mijko@ucdavis.edu)
- \* Correspondence: [cedavis@ucdavis.edu](mailto:cedavis@ucdavis.edu)

Received: 16 December 2019; Accepted: 30 January 2020; Published: date

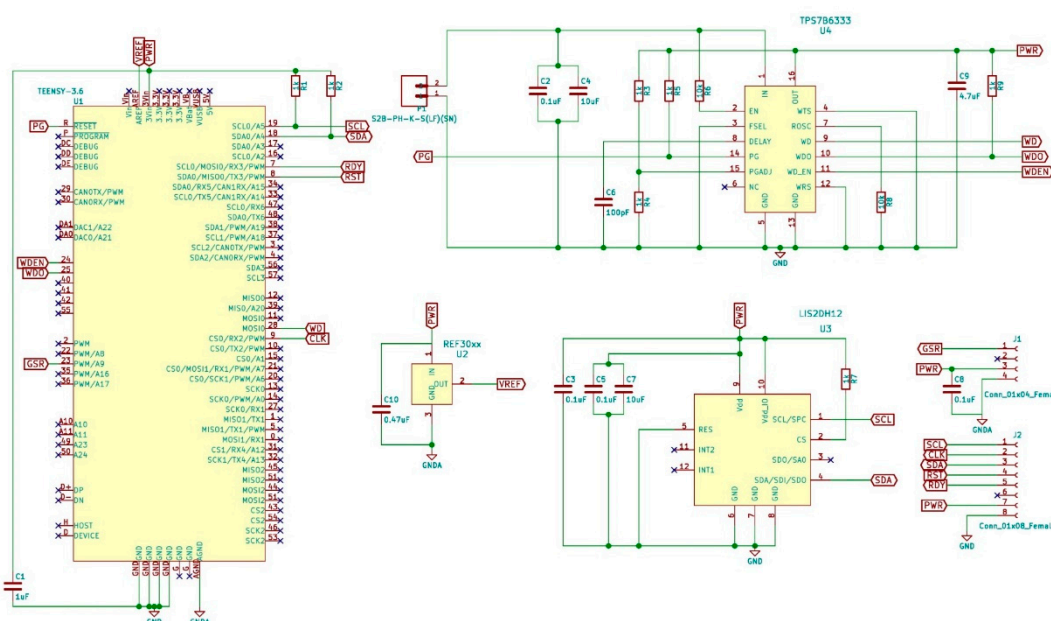

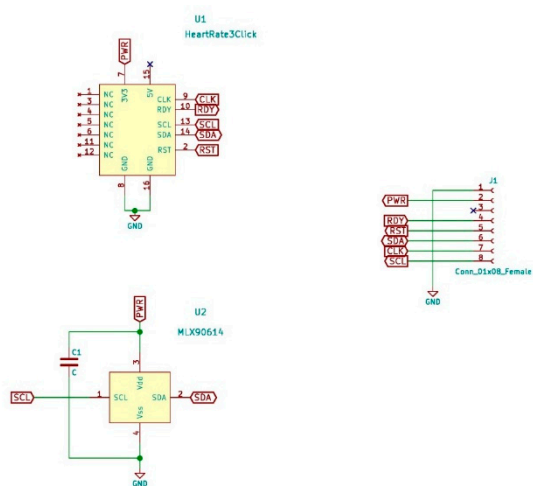

**Figure S2.** Schematics for the peripheral board of device, which contains the optical pulse oximetry and temperature sensors.
